# Supplementary material
Source: publisher figshare collection journal article supplement (https://future-science-group.figshare.com/ndownloader/files/35098039)
Supplement: Supplementary file 1 [file 35098039]

## Sheet: Résumé - Finale
	Supplementary Table 1: Method validation detailed results. A: Sample stability at -20oC, 4oC, and 22oC; B: Processed sample stability in autosampler (10oC); C: Effect of freeze/thaw cycles, and adsorption to plastic- and glassware; and D: Matrix effect.
	A) Sample stability
	Stability (bias %) (n = 2)	Creatinine
		22oC			4oC			-20oC
	Timepoint (days)	uLQC	uMQC	uHQC	uLQC	uMQC	uHQC	uLQC	uMQC	uHQC
	9	-4.03226	-1.52838	-0.580431	-2.15054	-1.36463	0.469873	-2.41935	4.85808	1.6031
	23	-2.68817	-2.01965	-0.967385	0	-0.10917	2.62576	-1.07527	2.45633	2.5152
	36	-8.87097	-6.27729	-8.31951	-0.268817	-0.818777	0.856827	-1.6129	0.818777	-1.43726
	86	-15.3226	-11.19	-10.3372	-3.22581	-0.491266	1.57546	0.806452	0.873362	3.53787
	141	---	---	---	---	---	---	-1.02151	1.53384	-0.505804
	Stability (bias %) (n = 2)	MMA
		22oC			4oC			-20oC
	Timepoint (days)	uLQC	uMQC	uHQC	uLQC	uMQC	uHQC	uLQC	uMQC	uHQC
	9	5.5507	1.36859	3.60086	5.98776	1.223	3.7643	-4.50175	3.09493	2.90576
	23	-2.0979	4.05863	3.58431	-4.72028	3.18506	3.20987	4.45804	3.28905	1.69968
	36	-2.97203	7.21318	5.88683	-4.93881	8.08675	7.80663	-6.68706	7.58063	2.83129
	86	2.92832	0.599018	3.26159	2.92832	1.04967	1.80519	6.64336	1.9371	2.14033
	141	---	---	---	---	---	---	7.84528	-6.93447	-5.81132
	B) Processed sample stability in autosampler (10oC)
	Stability (bias %) (n = 2)	Creatinine			MMA
		Autosampler (10oC)			Autosampler (10oC)
	Timepoint (hours)	uLQC	uMQC	uHQC	uLQC	uMQC	uHQC
	24	0.274725	2.43498	0.85282	-10.5155	1.21233	-0.867259
	80	1.0989	2.54566	0.88033	-9.89691	0.232877	-1.7724
	192	1.64835	4.03985	3.27373	-9.89691	3.46575	1.67271
	C) Effect of freeze-thaw cycles, and adsorption to plastic- and glassware
	(bias %) (n = 2)	Creatinine			MMA
		uLQC	uMQC	uHQC	uLQC	uMQC	uHQC
	5 Freeze-thaw cycles	0.824176	2.76702	2.58597	1.64948	0.226027	-2.02959
	5 Plastic transfers	0	0.216606	-0.144509	6.34697	-0.644843	1.69022
	5 Glass transfers	0.179856	0	0.743158	3.57143	0.913715	1.05038
	D) Matrix effect (n = 5)
		Creatinine			MMA
		uLQC	uMQC	uHQC	uLQC	uMQC	uHQC
	Creatinine concentration (mM)*	1.8	9.1	18.7	1.8	9.1	18.7
	Matrix effect (%)	-87.4	-94.5	-96.8	28	27.7	-10.9
	* Matrix effect was related to various creatinine concentrations.
